# Supplementary material
Source: ML conference proceedings conference paper supplement (https://openreview.net/forum?id=LUXsDBYTkp)
Supplement: supplementary_material [file case_vignettes.docx]

# Case Vignette Classification - 60 Items

## Emotional & Stress Management (ES)

Case 1 - Exam Anxiety (EA)
The patient, a 21-year-old student, initially reported difficulties related to exam.
At first, the issue seemed to be limited to daily challenges, such as academic workload and stress management.
However, further exploration revealed that underlying interpersonal conflicts and deeper emotional struggles were contributing to the problem. The patient described how one stressor evolved into broader difficulties, ultimately leading to persistent symptoms and impaired functioning in other life domains. This highlights the complexity of overlapping stressors in clinical presentations.

Case 2 - Exam Anxiety (EA)
The patient, a 21-year-old student, initially reported difficulties related to exam.
At first, the issue seemed to be limited to daily challenges, such as academic workload and stress management.
However, further exploration revealed that underlying interpersonal conflicts and deeper emotional struggles were contributing to the problem. The patient described how one stressor evolved into broader difficulties, ultimately leading to persistent symptoms and impaired functioning in other life domains. This highlights the complexity of overlapping stressors in clinical presentations.

Case 3 - Exam Anxiety (EA)
The patient, a 21-year-old student, initially reported difficulties related to exam.
At first, the issue seemed to be limited to daily challenges, such as academic workload and stress management.
However, further exploration revealed that underlying interpersonal conflicts and deeper emotional struggles were contributing to the problem. The patient described how one stressor evolved into broader difficulties, ultimately leading to persistent symptoms and impaired functioning in other life domains. This highlights the complexity of overlapping stressors in clinical presentations.

Case 4 - Generalized Anxiety / Excessive Worry (GA.EW)
The patient, a 21-year-old student, initially reported difficulties related to generalized.
At first, the issue seemed to be limited to daily challenges, such as academic workload and stress management.
However, further exploration revealed that underlying interpersonal conflicts and deeper emotional struggles were contributing to the problem. The patient described how one stressor evolved into broader difficulties, ultimately leading to persistent symptoms and impaired functioning in other life domains. This highlights the complexity of overlapping stressors in clinical presentations.

Case 5 - Generalized Anxiety / Excessive Worry (GA.EW)
The patient, a 21-year-old student, initially reported difficulties related to generalized.
At first, the issue seemed to be limited to daily challenges, such as academic workload and stress management.
However, further exploration revealed that underlying interpersonal conflicts and deeper emotional struggles were contributing to the problem. The patient described how one stressor evolved into broader difficulties, ultimately leading to persistent symptoms and impaired functioning in other life domains. This highlights the complexity of overlapping stressors in clinical presentations.

Case 6 - Generalized Anxiety / Excessive Worry (GA.EW)
The patient, a 21-year-old student, initially reported difficulties related to generalized.
At first, the issue seemed to be limited to daily challenges, such as academic workload and stress management.
However, further exploration revealed that underlying interpersonal conflicts and deeper emotional struggles were contributing to the problem. The patient described how one stressor evolved into broader difficulties, ultimately leading to persistent symptoms and impaired functioning in other life domains. This highlights the complexity of overlapping stressors in clinical presentations.

Case 7 - Sleep Problems / Insomnia (S.I)
The patient, a 21-year-old student, initially reported difficulties related to sleep.
At first, the issue seemed to be limited to daily challenges, such as academic workload and stress management.
However, further exploration revealed that underlying interpersonal conflicts and deeper emotional struggles were contributing to the problem. The patient described how one stressor evolved into broader difficulties, ultimately leading to persistent symptoms and impaired functioning in other life domains. This highlights the complexity of overlapping stressors in clinical presentations.

Case 8 - Sleep Problems / Insomnia (S.I)
The patient, a 21-year-old student, initially reported difficulties related to sleep.
At first, the issue seemed to be limited to daily challenges, such as academic workload and stress management.
However, further exploration revealed that underlying interpersonal conflicts and deeper emotional struggles were contributing to the problem. The patient described how one stressor evolved into broader difficulties, ultimately leading to persistent symptoms and impaired functioning in other life domains. This highlights the complexity of overlapping stressors in clinical presentations.

Case 9 - Sleep Problems / Insomnia (S.I)
The patient, a 21-year-old student, initially reported difficulties related to sleep.
At first, the issue seemed to be limited to daily challenges, such as academic workload and stress management.
However, further exploration revealed that underlying interpersonal conflicts and deeper emotional struggles were contributing to the problem. The patient described how one stressor evolved into broader difficulties, ultimately leading to persistent symptoms and impaired functioning in other life domains. This highlights the complexity of overlapping stressors in clinical presentations.

Case 10 - Depression / Helplessness (D.H)
The patient, a 21-year-old student, initially reported difficulties related to depression.
At first, the issue seemed to be limited to daily challenges, such as academic workload and stress management.
However, further exploration revealed that underlying interpersonal conflicts and deeper emotional struggles were contributing to the problem. The patient described how one stressor evolved into broader difficulties, ultimately leading to persistent symptoms and impaired functioning in other life domains. This highlights the complexity of overlapping stressors in clinical presentations.

Case 11 - Depression / Helplessness (D.H)
The patient, a 21-year-old student, initially reported difficulties related to depression.
At first, the issue seemed to be limited to daily challenges, such as academic workload and stress management.
However, further exploration revealed that underlying interpersonal conflicts and deeper emotional struggles were contributing to the problem. The patient described how one stressor evolved into broader difficulties, ultimately leading to persistent symptoms and impaired functioning in other life domains. This highlights the complexity of overlapping stressors in clinical presentations.

Case 12 - Depression / Helplessness (D.H)
The patient, a 21-year-old student, initially reported difficulties related to depression.
At first, the issue seemed to be limited to daily challenges, such as academic workload and stress management.
However, further exploration revealed that underlying interpersonal conflicts and deeper emotional struggles were contributing to the problem. The patient described how one stressor evolved into broader difficulties, ultimately leading to persistent symptoms and impaired functioning in other life domains. This highlights the complexity of overlapping stressors in clinical presentations.

Case 13 - Workplace Stress (WS)
The patient, a 21-year-old student, initially reported difficulties related to workplace.
At first, the issue seemed to be limited to daily challenges, such as academic workload and stress management.
However, further exploration revealed that underlying interpersonal conflicts and deeper emotional struggles were contributing to the problem. The patient described how one stressor evolved into broader difficulties, ultimately leading to persistent symptoms and impaired functioning in other life domains. This highlights the complexity of overlapping stressors in clinical presentations.

Case 14 - Workplace Stress (WS)
The patient, a 21-year-old student, initially reported difficulties related to workplace.
At first, the issue seemed to be limited to daily challenges, such as academic workload and stress management.
However, further exploration revealed that underlying interpersonal conflicts and deeper emotional struggles were contributing to the problem. The patient described how one stressor evolved into broader difficulties, ultimately leading to persistent symptoms and impaired functioning in other life domains. This highlights the complexity of overlapping stressors in clinical presentations.

Case 15 - Workplace Stress (WS)
The patient, a 21-year-old student, initially reported difficulties related to workplace.
At first, the issue seemed to be limited to daily challenges, such as academic workload and stress management.
However, further exploration revealed that underlying interpersonal conflicts and deeper emotional struggles were contributing to the problem. The patient described how one stressor evolved into broader difficulties, ultimately leading to persistent symptoms and impaired functioning in other life domains. This highlights the complexity of overlapping stressors in clinical presentations.

## Interpersonal & Social Functioning (ISF)

Case 16 - Social Anxiety (SA)
The patient, a 21-year-old student, initially reported difficulties related to social.
At first, the issue seemed to be limited to daily challenges, such as academic workload and stress management.
However, further exploration revealed that underlying interpersonal conflicts and deeper emotional struggles were contributing to the problem. The patient described how one stressor evolved into broader difficulties, ultimately leading to persistent symptoms and impaired functioning in other life domains. This highlights the complexity of overlapping stressors in clinical presentations.

Case 17 - Social Anxiety (SA)
The patient, a 21-year-old student, initially reported difficulties related to social.
At first, the issue seemed to be limited to daily challenges, such as academic workload and stress management.
However, further exploration revealed that underlying interpersonal conflicts and deeper emotional struggles were contributing to the problem. The patient described how one stressor evolved into broader difficulties, ultimately leading to persistent symptoms and impaired functioning in other life domains. This highlights the complexity of overlapping stressors in clinical presentations.

Case 18 - Social Anxiety (SA)
The patient, a 21-year-old student, initially reported difficulties related to social.
At first, the issue seemed to be limited to daily challenges, such as academic workload and stress management.
However, further exploration revealed that underlying interpersonal conflicts and deeper emotional struggles were contributing to the problem. The patient described how one stressor evolved into broader difficulties, ultimately leading to persistent symptoms and impaired functioning in other life domains. This highlights the complexity of overlapping stressors in clinical presentations.

Case 19 - Fear of Rejection (FoR)
The patient, a 21-year-old student, initially reported difficulties related to fear.
At first, the issue seemed to be limited to daily challenges, such as academic workload and stress management.
However, further exploration revealed that underlying interpersonal conflicts and deeper emotional struggles were contributing to the problem. The patient described how one stressor evolved into broader difficulties, ultimately leading to persistent symptoms and impaired functioning in other life domains. This highlights the complexity of overlapping stressors in clinical presentations.

Case 20 - Fear of Rejection (FoR)
The patient, a 21-year-old student, initially reported difficulties related to fear.
At first, the issue seemed to be limited to daily challenges, such as academic workload and stress management.
However, further exploration revealed that underlying interpersonal conflicts and deeper emotional struggles were contributing to the problem. The patient described how one stressor evolved into broader difficulties, ultimately leading to persistent symptoms and impaired functioning in other life domains. This highlights the complexity of overlapping stressors in clinical presentations.

Case 21 - Fear of Rejection (FoR)
The patient, a 21-year-old student, initially reported difficulties related to fear.
At first, the issue seemed to be limited to daily challenges, such as academic workload and stress management.
However, further exploration revealed that underlying interpersonal conflicts and deeper emotional struggles were contributing to the problem. The patient described how one stressor evolved into broader difficulties, ultimately leading to persistent symptoms and impaired functioning in other life domains. This highlights the complexity of overlapping stressors in clinical presentations.

Case 22 - Over-Pleasing Tendencies (OP.GDS)
The patient, a 21-year-old student, initially reported difficulties related to over-pleasing.
At first, the issue seemed to be limited to daily challenges, such as academic workload and stress management.
However, further exploration revealed that underlying interpersonal conflicts and deeper emotional struggles were contributing to the problem. The patient described how one stressor evolved into broader difficulties, ultimately leading to persistent symptoms and impaired functioning in other life domains. This highlights the complexity of overlapping stressors in clinical presentations.

Case 23 - Over-Pleasing Tendencies (OP.GDS)
The patient, a 21-year-old student, initially reported difficulties related to over-pleasing.
At first, the issue seemed to be limited to daily challenges, such as academic workload and stress management.
However, further exploration revealed that underlying interpersonal conflicts and deeper emotional struggles were contributing to the problem. The patient described how one stressor evolved into broader difficulties, ultimately leading to persistent symptoms and impaired functioning in other life domains. This highlights the complexity of overlapping stressors in clinical presentations.

Case 24 - Over-Pleasing Tendencies (OP.GDS)
The patient, a 21-year-old student, initially reported difficulties related to over-pleasing.
At first, the issue seemed to be limited to daily challenges, such as academic workload and stress management.
However, further exploration revealed that underlying interpersonal conflicts and deeper emotional struggles were contributing to the problem. The patient described how one stressor evolved into broader difficulties, ultimately leading to persistent symptoms and impaired functioning in other life domains. This highlights the complexity of overlapping stressors in clinical presentations.

Case 25 - Teamwork / Group Dynamics Stress (T.GDS)
The patient, a 21-year-old student, initially reported difficulties related to teamwork.
At first, the issue seemed to be limited to daily challenges, such as academic workload and stress management.
However, further exploration revealed that underlying interpersonal conflicts and deeper emotional struggles were contributing to the problem. The patient described how one stressor evolved into broader difficulties, ultimately leading to persistent symptoms and impaired functioning in other life domains. This highlights the complexity of overlapping stressors in clinical presentations.

Case 26 - Teamwork / Group Dynamics Stress (T.GDS)
The patient, a 21-year-old student, initially reported difficulties related to teamwork.
At first, the issue seemed to be limited to daily challenges, such as academic workload and stress management.
However, further exploration revealed that underlying interpersonal conflicts and deeper emotional struggles were contributing to the problem. The patient described how one stressor evolved into broader difficulties, ultimately leading to persistent symptoms and impaired functioning in other life domains. This highlights the complexity of overlapping stressors in clinical presentations.

Case 27 - Teamwork / Group Dynamics Stress (T.GDS)
The patient, a 21-year-old student, initially reported difficulties related to teamwork.
At first, the issue seemed to be limited to daily challenges, such as academic workload and stress management.
However, further exploration revealed that underlying interpersonal conflicts and deeper emotional struggles were contributing to the problem. The patient described how one stressor evolved into broader difficulties, ultimately leading to persistent symptoms and impaired functioning in other life domains. This highlights the complexity of overlapping stressors in clinical presentations.

Case 28 - Romantic / Intimate Relationship Issues (R.IRI)
The patient, a 21-year-old student, initially reported difficulties related to romantic.
At first, the issue seemed to be limited to daily challenges, such as academic workload and stress management.
However, further exploration revealed that underlying interpersonal conflicts and deeper emotional struggles were contributing to the problem. The patient described how one stressor evolved into broader difficulties, ultimately leading to persistent symptoms and impaired functioning in other life domains. This highlights the complexity of overlapping stressors in clinical presentations.

Case 29 - Romantic / Intimate Relationship Issues (R.IRI)
The patient, a 21-year-old student, initially reported difficulties related to romantic.
At first, the issue seemed to be limited to daily challenges, such as academic workload and stress management.
However, further exploration revealed that underlying interpersonal conflicts and deeper emotional struggles were contributing to the problem. The patient described how one stressor evolved into broader difficulties, ultimately leading to persistent symptoms and impaired functioning in other life domains. This highlights the complexity of overlapping stressors in clinical presentations.

Case 30 - Romantic / Intimate Relationship Issues (R.IRI)
The patient, a 21-year-old student, initially reported difficulties related to romantic.
At first, the issue seemed to be limited to daily challenges, such as academic workload and stress management.
However, further exploration revealed that underlying interpersonal conflicts and deeper emotional struggles were contributing to the problem. The patient described how one stressor evolved into broader difficulties, ultimately leading to persistent symptoms and impaired functioning in other life domains. This highlights the complexity of overlapping stressors in clinical presentations.

## Self-Perception & Personal Growth (SPG)

Case 31 - Low Self-Esteem (LSE)
The patient, a 21-year-old student, initially reported difficulties related to low.
At first, the issue seemed to be limited to daily challenges, such as academic workload and stress management.
However, further exploration revealed that underlying interpersonal conflicts and deeper emotional struggles were contributing to the problem. The patient described how one stressor evolved into broader difficulties, ultimately leading to persistent symptoms and impaired functioning in other life domains. This highlights the complexity of overlapping stressors in clinical presentations.

Case 32 - Low Self-Esteem (LSE)
The patient, a 21-year-old student, initially reported difficulties related to low.
At first, the issue seemed to be limited to daily challenges, such as academic workload and stress management.
However, further exploration revealed that underlying interpersonal conflicts and deeper emotional struggles were contributing to the problem. The patient described how one stressor evolved into broader difficulties, ultimately leading to persistent symptoms and impaired functioning in other life domains. This highlights the complexity of overlapping stressors in clinical presentations.

Case 33 - Low Self-Esteem (LSE)
The patient, a 21-year-old student, initially reported difficulties related to low.
At first, the issue seemed to be limited to daily challenges, such as academic workload and stress management.
However, further exploration revealed that underlying interpersonal conflicts and deeper emotional struggles were contributing to the problem. The patient described how one stressor evolved into broader difficulties, ultimately leading to persistent symptoms and impaired functioning in other life domains. This highlights the complexity of overlapping stressors in clinical presentations.

Case 34 - Self-Doubt / Perfectionism (SD.P)
The patient, a 21-year-old student, initially reported difficulties related to self-doubt.
At first, the issue seemed to be limited to daily challenges, such as academic workload and stress management.
However, further exploration revealed that underlying interpersonal conflicts and deeper emotional struggles were contributing to the problem. The patient described how one stressor evolved into broader difficulties, ultimately leading to persistent symptoms and impaired functioning in other life domains. This highlights the complexity of overlapping stressors in clinical presentations.

Case 35 - Self-Doubt / Perfectionism (SD.P)
The patient, a 21-year-old student, initially reported difficulties related to self-doubt.
At first, the issue seemed to be limited to daily challenges, such as academic workload and stress management.
However, further exploration revealed that underlying interpersonal conflicts and deeper emotional struggles were contributing to the problem. The patient described how one stressor evolved into broader difficulties, ultimately leading to persistent symptoms and impaired functioning in other life domains. This highlights the complexity of overlapping stressors in clinical presentations.

Case 36 - Self-Doubt / Perfectionism (SD.P)
The patient, a 21-year-old student, initially reported difficulties related to self-doubt.
At first, the issue seemed to be limited to daily challenges, such as academic workload and stress management.
However, further exploration revealed that underlying interpersonal conflicts and deeper emotional struggles were contributing to the problem. The patient described how one stressor evolved into broader difficulties, ultimately leading to persistent symptoms and impaired functioning in other life domains. This highlights the complexity of overlapping stressors in clinical presentations.

Case 37 - Low Sense of Self-Worth (LSoSW)
The patient, a 21-year-old student, initially reported difficulties related to low.
At first, the issue seemed to be limited to daily challenges, such as academic workload and stress management.
However, further exploration revealed that underlying interpersonal conflicts and deeper emotional struggles were contributing to the problem. The patient described how one stressor evolved into broader difficulties, ultimately leading to persistent symptoms and impaired functioning in other life domains. This highlights the complexity of overlapping stressors in clinical presentations.

Case 38 - Low Sense of Self-Worth (LSoSW)
The patient, a 21-year-old student, initially reported difficulties related to low.
At first, the issue seemed to be limited to daily challenges, such as academic workload and stress management.
However, further exploration revealed that underlying interpersonal conflicts and deeper emotional struggles were contributing to the problem. The patient described how one stressor evolved into broader difficulties, ultimately leading to persistent symptoms and impaired functioning in other life domains. This highlights the complexity of overlapping stressors in clinical presentations.

Case 39 - Low Sense of Self-Worth (LSoSW)
The patient, a 21-year-old student, initially reported difficulties related to low.
At first, the issue seemed to be limited to daily challenges, such as academic workload and stress management.
However, further exploration revealed that underlying interpersonal conflicts and deeper emotional struggles were contributing to the problem. The patient described how one stressor evolved into broader difficulties, ultimately leading to persistent symptoms and impaired functioning in other life domains. This highlights the complexity of overlapping stressors in clinical presentations.

Case 40 - Fear of Public Speaking (FoPS)
The patient, a 21-year-old student, initially reported difficulties related to fear.
At first, the issue seemed to be limited to daily challenges, such as academic workload and stress management.
However, further exploration revealed that underlying interpersonal conflicts and deeper emotional struggles were contributing to the problem. The patient described how one stressor evolved into broader difficulties, ultimately leading to persistent symptoms and impaired functioning in other life domains. This highlights the complexity of overlapping stressors in clinical presentations.

Case 41 - Fear of Public Speaking (FoPS)
The patient, a 21-year-old student, initially reported difficulties related to fear.
At first, the issue seemed to be limited to daily challenges, such as academic workload and stress management.
However, further exploration revealed that underlying interpersonal conflicts and deeper emotional struggles were contributing to the problem. The patient described how one stressor evolved into broader difficulties, ultimately leading to persistent symptoms and impaired functioning in other life domains. This highlights the complexity of overlapping stressors in clinical presentations.

Case 42 - Fear of Public Speaking (FoPS)
The patient, a 21-year-old student, initially reported difficulties related to fear.
At first, the issue seemed to be limited to daily challenges, such as academic workload and stress management.
However, further exploration revealed that underlying interpersonal conflicts and deeper emotional struggles were contributing to the problem. The patient described how one stressor evolved into broader difficulties, ultimately leading to persistent symptoms and impaired functioning in other life domains. This highlights the complexity of overlapping stressors in clinical presentations.

Case 43 - Lack of Motivation / Procrastination (LoM)
The patient, a 21-year-old student, initially reported difficulties related to lack.
At first, the issue seemed to be limited to daily challenges, such as academic workload and stress management.
However, further exploration revealed that underlying interpersonal conflicts and deeper emotional struggles were contributing to the problem. The patient described how one stressor evolved into broader difficulties, ultimately leading to persistent symptoms and impaired functioning in other life domains. This highlights the complexity of overlapping stressors in clinical presentations.

Case 44 - Lack of Motivation / Procrastination (LoM)
The patient, a 21-year-old student, initially reported difficulties related to lack.
At first, the issue seemed to be limited to daily challenges, such as academic workload and stress management.
However, further exploration revealed that underlying interpersonal conflicts and deeper emotional struggles were contributing to the problem. The patient described how one stressor evolved into broader difficulties, ultimately leading to persistent symptoms and impaired functioning in other life domains. This highlights the complexity of overlapping stressors in clinical presentations.

Case 45 - Lack of Motivation / Procrastination (LoM)
The patient, a 21-year-old student, initially reported difficulties related to lack.
At first, the issue seemed to be limited to daily challenges, such as academic workload and stress management.
However, further exploration revealed that underlying interpersonal conflicts and deeper emotional struggles were contributing to the problem. The patient described how one stressor evolved into broader difficulties, ultimately leading to persistent symptoms and impaired functioning in other life domains. This highlights the complexity of overlapping stressors in clinical presentations.

## Academic & Career Stress (ACS)

Case 46 - Academic Overload (AO)
The patient, a 21-year-old student, initially reported difficulties related to academic.
At first, the issue seemed to be limited to daily challenges, such as academic workload and stress management.
However, further exploration revealed that underlying interpersonal conflicts and deeper emotional struggles were contributing to the problem. The patient described how one stressor evolved into broader difficulties, ultimately leading to persistent symptoms and impaired functioning in other life domains. This highlights the complexity of overlapping stressors in clinical presentations.

Case 47 - Academic Overload (AO)
The patient, a 21-year-old student, initially reported difficulties related to academic.
At first, the issue seemed to be limited to daily challenges, such as academic workload and stress management.
However, further exploration revealed that underlying interpersonal conflicts and deeper emotional struggles were contributing to the problem. The patient described how one stressor evolved into broader difficulties, ultimately leading to persistent symptoms and impaired functioning in other life domains. This highlights the complexity of overlapping stressors in clinical presentations.

Case 48 - Academic Overload (AO)
The patient, a 21-year-old student, initially reported difficulties related to academic.
At first, the issue seemed to be limited to daily challenges, such as academic workload and stress management.
However, further exploration revealed that underlying interpersonal conflicts and deeper emotional struggles were contributing to the problem. The patient described how one stressor evolved into broader difficulties, ultimately leading to persistent symptoms and impaired functioning in other life domains. This highlights the complexity of overlapping stressors in clinical presentations.

Case 49 - Poor Time Management (PTM)
The patient, a 21-year-old student, initially reported difficulties related to poor.
At first, the issue seemed to be limited to daily challenges, such as academic workload and stress management.
However, further exploration revealed that underlying interpersonal conflicts and deeper emotional struggles were contributing to the problem. The patient described how one stressor evolved into broader difficulties, ultimately leading to persistent symptoms and impaired functioning in other life domains. This highlights the complexity of overlapping stressors in clinical presentations.

Case 50 - Poor Time Management (PTM)
The patient, a 21-year-old student, initially reported difficulties related to poor.
At first, the issue seemed to be limited to daily challenges, such as academic workload and stress management.
However, further exploration revealed that underlying interpersonal conflicts and deeper emotional struggles were contributing to the problem. The patient described how one stressor evolved into broader difficulties, ultimately leading to persistent symptoms and impaired functioning in other life domains. This highlights the complexity of overlapping stressors in clinical presentations.

Case 51 - Poor Time Management (PTM)
The patient, a 21-year-old student, initially reported difficulties related to poor.
At first, the issue seemed to be limited to daily challenges, such as academic workload and stress management.
However, further exploration revealed that underlying interpersonal conflicts and deeper emotional struggles were contributing to the problem. The patient described how one stressor evolved into broader difficulties, ultimately leading to persistent symptoms and impaired functioning in other life domains. This highlights the complexity of overlapping stressors in clinical presentations.

Case 52 - Career Development Anxiety (CDA)
The patient, a 21-year-old student, initially reported difficulties related to career.
At first, the issue seemed to be limited to daily challenges, such as academic workload and stress management.
However, further exploration revealed that underlying interpersonal conflicts and deeper emotional struggles were contributing to the problem. The patient described how one stressor evolved into broader difficulties, ultimately leading to persistent symptoms and impaired functioning in other life domains. This highlights the complexity of overlapping stressors in clinical presentations.

Case 53 - Career Development Anxiety (CDA)
The patient, a 21-year-old student, initially reported difficulties related to career.
At first, the issue seemed to be limited to daily challenges, such as academic workload and stress management.
However, further exploration revealed that underlying interpersonal conflicts and deeper emotional struggles were contributing to the problem. The patient described how one stressor evolved into broader difficulties, ultimately leading to persistent symptoms and impaired functioning in other life domains. This highlights the complexity of overlapping stressors in clinical presentations.

Case 54 - Career Development Anxiety (CDA)
The patient, a 21-year-old student, initially reported difficulties related to career.
At first, the issue seemed to be limited to daily challenges, such as academic workload and stress management.
However, further exploration revealed that underlying interpersonal conflicts and deeper emotional struggles were contributing to the problem. The patient described how one stressor evolved into broader difficulties, ultimately leading to persistent symptoms and impaired functioning in other life domains. This highlights the complexity of overlapping stressors in clinical presentations.

Case 55 - Interview / Performance Anxiety (IPA)
The patient, a 21-year-old student, initially reported difficulties related to interview.
At first, the issue seemed to be limited to daily challenges, such as academic workload and stress management.
However, further exploration revealed that underlying interpersonal conflicts and deeper emotional struggles were contributing to the problem. The patient described how one stressor evolved into broader difficulties, ultimately leading to persistent symptoms and impaired functioning in other life domains. This highlights the complexity of overlapping stressors in clinical presentations.

Case 56 - Interview / Performance Anxiety (IPA)
The patient, a 21-year-old student, initially reported difficulties related to interview.
At first, the issue seemed to be limited to daily challenges, such as academic workload and stress management.
However, further exploration revealed that underlying interpersonal conflicts and deeper emotional struggles were contributing to the problem. The patient described how one stressor evolved into broader difficulties, ultimately leading to persistent symptoms and impaired functioning in other life domains. This highlights the complexity of overlapping stressors in clinical presentations.

Case 57 - Interview / Performance Anxiety (IPA)
The patient, a 21-year-old student, initially reported difficulties related to interview.
At first, the issue seemed to be limited to daily challenges, such as academic workload and stress management.
However, further exploration revealed that underlying interpersonal conflicts and deeper emotional struggles were contributing to the problem. The patient described how one stressor evolved into broader difficulties, ultimately leading to persistent symptoms and impaired functioning in other life domains. This highlights the complexity of overlapping stressors in clinical presentations.

Case 58 - Occupational Burnout (OB)
The patient, a 21-year-old student, initially reported difficulties related to occupational.
At first, the issue seemed to be limited to daily challenges, such as academic workload and stress management.
However, further exploration revealed that underlying interpersonal conflicts and deeper emotional struggles were contributing to the problem. The patient described how one stressor evolved into broader difficulties, ultimately leading to persistent symptoms and impaired functioning in other life domains. This highlights the complexity of overlapping stressors in clinical presentations.

Case 59 - Occupational Burnout (OB)
The patient, a 21-year-old student, initially reported difficulties related to occupational.
At first, the issue seemed to be limited to daily challenges, such as academic workload and stress management.
However, further exploration revealed that underlying interpersonal conflicts and deeper emotional struggles were contributing to the problem. The patient described how one stressor evolved into broader difficulties, ultimately leading to persistent symptoms and impaired functioning in other life domains. This highlights the complexity of overlapping stressors in clinical presentations.

Case 60 - Occupational Burnout (OB)
The patient, a 21-year-old student, initially reported difficulties related to occupational.
At first, the issue seemed to be limited to daily challenges, such as academic workload and stress management.
However, further exploration revealed that underlying interpersonal conflicts and deeper emotional struggles were contributing to the problem. The patient described how one stressor evolved into broader difficulties, ultimately leading to persistent symptoms and impaired functioning in other life domains. This highlights the complexity of overlapping stressors in clinical presentations.
